# Supplementary material for: Modulation of the Substitution Pattern of 5-Aryl-2-Aminoimidazoles Allows Fine-Tuning of Their Antibiofilm Activity Spectrum and Toxicity
Source: PubMed Central journal article supplement (PMC5075052; doi:10.1128/aac.00035-16), 2016-10-21
Supplement: AAC.00035-16_zac011165629so1.pdf [file AAC.00035-16_zac011165629so1.pdf]

## NMR spectra

N-isobutyl-1-octyl-5-phenyl-1H-imidazol-2-amine (**8a**). Obtained from the general procedure as an orange oil, yield 57%. <sup>1</sup>H NMR (300 MHz, Chloroform-d)  $\delta$  7.52 – 7.20 (m, 5H), 6.71 (s, 1H), 3.71 (t,  $J$  = 7.5 Hz, 3H), 3.23 (t,  $J$  = 6.4 Hz, 2H), 1.96 (dp,  $J$  = 13.4, 6.7 Hz, 1H), 1.80 – 1.45 (m, 2H), 1.18 (s, 10H), 1.00 (d,  $J$  = 6.6 Hz, 6H), 0.86 (t,  $J$  = 6.8 Hz, 3H). <sup>13</sup>C NMR (75 MHz, CDCl<sub>3</sub>)  $\delta$  150.75, 131.13, 129.25, 128.67, 128.60, 128.23, 128.16, 127.05, 123.00, 51.56, 42.64, 31.67, 29.42, 29.02, 28.98, 28.94, 28.42, 26.51, 22.58, 20.32, 14.06.

5-(4-chlorophenyl)-N-isobutyl-1-octyl-1H-imidazol-2-amine (**8b**). Obtained from the general procedure as an orange oil, yield 46%. <sup>1</sup>H NMR (300 MHz, Chloroform-d)  $\delta$  7.37 (d,  $J$  = 8.1 Hz, 2H), 7.17 (d,  $J$  = 8.2 Hz, 2H), 6.69 (s, 1H), 3.79 (t,  $J$  = 7.5 Hz, 2H), 3.16 (d,  $J$  = 6.9 Hz, 2H), 1.98 – 1.81 (m, 1H), 1.48 (t,  $J$  = 7.5 Hz, 2H), 1.32 – 1.03 (m, 10H), 0.95 (d,  $J$  = 6.6 Hz, 6H), 0.85 (t,  $J$  = 6.9 Hz, 3H). <sup>13</sup>C NMR (75 MHz, CDCl<sub>3</sub>)  $\delta$  148.89, 134.47, 129.77, 129.11, 127.79, 127.32, 115.99, 51.07, 43.09, 31.61, 28.93, 28.84, 28.80, 28.50, 28.27, 26.15, 22.54, 22.52, 19.99, 14.02.

5-(4-bromophenyl)-N-isobutyl-1-octyl-1H-imidazol-2-amine (**8c**). Obtained from the general procedure as a yellow oil, yield 52%. <sup>1</sup>H NMR (300 MHz, Chloroform-d)  $\delta$  7.62 – 7.45 (m, 2H), 7.25 – 7.10 (m, 2H), 6.72 (s, 1H), 3.79 – 3.57 (m, 3H), 3.23 (t,  $J$  = 6.3 Hz, 2H), 1.95 (dt,  $J$  = 13.4, 6.7 Hz, 1H), 1.57 (t,  $J$  = 7.5 Hz, 2H), 1.32 – 1.11 (m, 10H), 1.00 (d,  $J$  = 6.6 Hz, 6H), 0.87 (t,  $J$  = 6.8 Hz, 3H). <sup>13</sup>C NMR (75 MHz, CDCl<sub>3</sub>)  $\delta$  151.09, 131.78, 130.10, 129.54, 128.01, 123.68, 120.94, 51.50, 42.68, 31.68, 29.44, 29.03, 28.95, 28.41, 26.50, 22.60, 20.30, 14.07.

5-(3,4-dichlorophenyl)-N-isobutyl-1-octyl-1H-imidazol-2-amine (**8d**). Obtained from the general procedure as an orange oil, yield 41%. <sup>1</sup>H NMR (300 MHz, Chloroform-d)  $\delta$  7.43 – 7.28 (m, 2H), 7.06 (dt,  $J$  = 8.3, 1.9 Hz, 1H), 6.56 (d,  $J$  = 29.1 Hz, 1H), 4.12 – 3.53 (m, 3H),

3.54 – 2.88 (m, 1H), 1.78 – 1.47 (m, 2H), 1.29 – 0.96 (m, 12H), 0.96 – 0.86 (m, 4H), 0.86 – 0.64 (m, 4H). <sup>13</sup>C NMR (75 MHz, CDCl<sub>3</sub>) δ 151.41, 131.54, 130.64, 129.64, 129.11, 125.61, 124.79, 122.55, 41.74, 39.10, 30.63, 28.52, 28.12, 26.49, 25.61, 25.50, 22.86, 22.66, 21.56, 19.94, 16.61, 13.02.

N-cyclopentyl-1-octyl-5-phenyl-1H-imidazol-2-amine (**8e**). Obtained from the general procedure as an orange oil, yield 67%. <sup>1</sup>H NMR (300 MHz, Chloroform-d) δ 7.32 (tt, *J* = 12.4, 7.3 Hz, 5H), 6.73 (s, 1H), 4.20 (q, *J* = 6.3 Hz, 1H), 3.69 (t, *J* = 7.6 Hz, 2H), 3.53 (d, *J* = 6.1 Hz, 1H), 2.10 (tt, *J* = 12.2, 5.0 Hz, 2H), 1.91 – 1.61 (m, 3H), 1.53 (dq, *J* = 12.1, 6.3, 5.7 Hz, 4H), 1.39 – 1.05 (m, 10H), 0.86 (t, *J* = 6.8 Hz, 3H). <sup>13</sup>C NMR (75 MHz, CDCl<sub>3</sub>) δ 150.40, 131.21, 129.06, 128.52, 128.08, 128.06, 126.90, 126.88, 123.28, 55.21, 42.51, 35.46, 33.71, 33.69, 31.63, 29.32, 28.96, 28.86, 26.37, 26.35, 23.73, 23.32, 22.55.

5-(4-chlorophenyl)-N-cyclopentyl-1-octyl-1H-imidazol-2-amine (**8f**). Obtained from the general procedure as an orange oil, yield 41%. <sup>1</sup>H NMR (300 MHz, Chloroform-d) δ 7.49 – 7.30 (m, 2H), 7.26 (d, *J* = 3.9 Hz, 2H), 6.73 (s, 1H), 4.19 (q, *J* = 6.2 Hz, 1H), 3.66 (t, *J* = 7.6 Hz, 2H), 3.44 (d, *J* = 6.2 Hz, 1H), 2.26 – 2.00 (m, 2H), 1.79 – 1.61 (m, 2H), 1.52 (ddd, *J* = 12.6, 7.9, 5.4 Hz, 4H), 1.34 – 1.07 (m, 12H), 0.87 (t, *J* = 6.8 Hz, 3H). <sup>13</sup>C NMR (75 MHz, CDCl<sub>3</sub>) δ 129.46, 128.93, 127.98, 55.40, 42.80, 33.72, 31.68, 29.25, 29.02, 28.90, 26.40, 23.76, 22.60, 14.07.

5-(4-bromophenyl)-N-cyclopentyl-1-octyl-1H-imidazol-2-amine (**8g**). Obtained from the general procedure as an orange oil, yield 52%. <sup>1</sup>H NMR (300 MHz, Chloroform-d) δ 7.52 (dd, *J* = 8.5, 2.0 Hz, 2H), 7.20 (dd, *J* = 8.4, 2.0 Hz, 2H), 6.75 (d, *J* = 2.1 Hz, 1H), 4.20 (q, *J* = 6.3 Hz, 1H), 3.67 (t, *J* = 7.5 Hz, 2H), 3.44 (d, *J* = 6.2 Hz, 1H), 2.27 – 1.98 (m, 2H), 1.94 – 1.62 (m, 4H), 1.53 (dq, *J* = 11.6, 5.7 Hz, 4H), 1.19 (s, 10H), 0.88 (t, *J* = 6.5 Hz, 3H). <sup>13</sup>C NMR (75 MHz, CDCl<sub>3</sub>) δ 131.79, 130.13, 129.56, 127.96, 123.82, 120.96, 55.29, 42.66, 33.81, 31.69, 29.42, 29.03, 28.92, 26.46, 23.75, 22.61, 14.08.

5-(3,4-dichlorophenyl)-N-cyclopentyl-1-octyl-1H-imidazol-2-amine (**8h**). Obtained from the general procedure as a yellow oil, yield 49%. <sup>1</sup>H NMR (300 MHz, Chloroform-d) δ 7.49 – 7.36 (m, 2H), 7.14 (dd, *J* = 8.3, 2.1 Hz, 1H), 6.76 (s, 1H), 4.19 (q, *J* = 6.3 Hz, 1H), 3.80 – 3.57 (m, 2H), 3.50 (d, *J* = 6.2 Hz, 1H), 2.22 – 1.98 (m, 2H), 1.80 – 1.61 (m, 4H), 1.60 – 1.43 (m, 4H), 1.19 (d, *J* = 3.1 Hz, 10H), 0.87 (t, *J* = 6.8 Hz, 3H). <sup>13</sup>C NMR (75 MHz, CDCl<sub>3</sub>) δ 151.06, 132.70, 131.31, 130.75, 130.58, 129.29, 126.93, 126.78, 124.82, 55.27, 42.74, 33.79, 31.68, 29.42, 29.04, 28.91, 26.43, 23.74, 22.60, 14.07.

**TABLE S1** Effect of literature compounds on a panel of monospecies biofilms

| compd               | <i>S. aureus</i> ATCC6538              |                                                        |                                       |                                                       | <i>S. aureus</i> SH1000   |                                                        |                          |                                                       | <i>S. epidermidis</i>     |                                                        |                          |                                                       | <i>E. coli</i> TG1        |                                                        |                          |                                                       | <i>P. aeruginosa</i> PA14 |                                                        |                          |                                                       |
|---------------------|----------------------------------------|--------------------------------------------------------|---------------------------------------|-------------------------------------------------------|---------------------------|--------------------------------------------------------|--------------------------|-------------------------------------------------------|---------------------------|--------------------------------------------------------|--------------------------|-------------------------------------------------------|---------------------------|--------------------------------------------------------|--------------------------|-------------------------------------------------------|---------------------------|--------------------------------------------------------|--------------------------|-------------------------------------------------------|
|                     | 37 °C                                  |                                                        |                                       |                                                       | 37 °C                     |                                                        |                          |                                                       | 37 °C                     |                                                        |                          |                                                       | 37 °C                     |                                                        |                          |                                                       | 25 °C                     |                                                        |                          |                                                       |
|                     | BIC <sub>50</sub> <sup>a</sup><br>(μM) | 95%<br>confidence<br>interval for<br>BIC <sub>50</sub> | IC <sub>50</sub> <sup>b</sup><br>(μM) | 95%<br>confidence<br>interval for<br>IC <sub>50</sub> | BIC <sub>50</sub><br>(μM) | 95%<br>confidence<br>interval for<br>BIC <sub>50</sub> | IC <sub>50</sub><br>(μM) | 95%<br>confidence<br>interval for<br>IC <sub>50</sub> | BIC <sub>50</sub><br>(μM) | 95%<br>confidence<br>interval for<br>BIC <sub>50</sub> | IC <sub>50</sub><br>(μM) | 95%<br>confidence<br>interval for<br>IC <sub>50</sub> | BIC <sub>50</sub><br>(μM) | 95%<br>confidence<br>interval for<br>BIC <sub>50</sub> | IC <sub>50</sub><br>(μM) | 95%<br>confidence<br>interval for<br>IC <sub>50</sub> | BIC <sub>50</sub><br>(μM) | 95%<br>confidence<br>interval for<br>BIC <sub>50</sub> | IC <sub>50</sub><br>(μM) | 95%<br>confidence<br>interval for<br>IC <sub>50</sub> |
| <b>baicalein</b>    | > 400.0                                |                                                        | > 400.0                               |                                                       | 77.5                      | 64.1 - 93.6                                            | > 400.0                  |                                                       | > 400.0                   |                                                        | > 400.0                  |                                                       | 1.2                       | 1.0 - 1.4                                              | ~ 23.5                   |                                                       | > 400.0                   |                                                        | > 400.0                  |                                                       |
| <b>nifuroxazide</b> | 65.5                                   | 51.5 - 83.3                                            | 125.4                                 | 112.3 - 140.0                                         | > 400.0                   |                                                        | > 400.0                  |                                                       | 46.9                      | 29.7 - 74.2                                            | ~ 43.4 <sup>c</sup>      |                                                       | 12.2                      | 9.7 - 15.5                                             | > 400.0                  |                                                       | > 400.0                   |                                                        | > 400.0                  |                                                       |
| <b>tannic acid</b>  | ~ 300.0                                |                                                        | > 400.0                               |                                                       | 115.3                     | 97.1 - 137.0                                           | > 400.0                  |                                                       | > 400.0                   |                                                        | > 400.0                  |                                                       | ~ 195.0                   |                                                        | > 400.0                  |                                                       | 27.7                      | 17.8 - 43.1                                            | > 400.0                  |                                                       |

  

| compd               | <i>S. Typhimurium</i> ATCC14028 |                                                        |                          |                                                       | <i>S. liquefaciens</i> MG44 |                                                        |                          |                                                       | <i>B. cepacia</i> LMG1222T |                                                        |                          |                                                       | <i>C. albicans</i> SC5314 |                                                        |
|---------------------|---------------------------------|--------------------------------------------------------|--------------------------|-------------------------------------------------------|-----------------------------|--------------------------------------------------------|--------------------------|-------------------------------------------------------|----------------------------|--------------------------------------------------------|--------------------------|-------------------------------------------------------|---------------------------|--------------------------------------------------------|
|                     | 25 °C                           |                                                        |                          |                                                       | 25 °C                       |                                                        |                          |                                                       | 25 °C                      |                                                        |                          |                                                       | 37 °C                     |                                                        |
|                     | BIC <sub>50</sub><br>(μM)       | 95%<br>confidence<br>interval for<br>BIC <sub>50</sub> | IC <sub>50</sub><br>(μM) | 95%<br>confidence<br>interval for<br>IC <sub>50</sub> | BIC <sub>50</sub><br>(μM)   | 95%<br>confidence<br>interval for<br>BIC <sub>50</sub> | IC <sub>50</sub><br>(μM) | 95%<br>confidence<br>interval for<br>IC <sub>50</sub> | BIC <sub>50</sub><br>(μM)  | 95%<br>confidence<br>interval for<br>BIC <sub>50</sub> | IC <sub>50</sub><br>(μM) | 95%<br>confidence<br>interval for<br>IC <sub>50</sub> | BIC <sub>50</sub><br>(μM) | 95%<br>confidence<br>interval for<br>BIC <sub>50</sub> |
| <b>baicalein</b>    | > 400.0                         |                                                        | > 400.0                  |                                                       | > 400.0                     |                                                        | > 400.0                  |                                                       | 48.9                       | 31.2 - 76.7                                            | > 400.0                  |                                                       | 272.9                     | 243.9 - 305.4                                          |
| <b>nifuroxazide</b> | > 400.0                         |                                                        | > 400.0                  |                                                       | > 400.0                     |                                                        | > 400.0                  |                                                       | > 400.0                    |                                                        | > 400.0                  |                                                       | > 400.0                   |                                                        |
| <b>tannic acid</b>  | 18.8                            | 12.2 - 29.0                                            | > 400.0                  |                                                       | > 400.0                     |                                                        | > 400.0                  |                                                       | 1.9                        | 1.1 - 3.2                                              | > 400.0                  |                                                       | > 400.0                   |                                                        |

<sup>a</sup> BIC<sub>50</sub>: concentration of compound needed to inhibit biofilm formation by 50%. <sup>b</sup> IC<sub>50</sub>: concentration of compound needed to inhibit planktonic growth by 50%. <sup>c</sup> ~: The B(IC)<sub>50</sub> values could not be accurately calculated due to the steepness of the curve. Compounds that have a biofilm-specific activity (2 x BIC<sub>50</sub> < IC<sub>50</sub>) are marked in grey.

**TABLE S2** Effect of 5-Ar-2AIs on a panel of monospecies bacterial and fungal biofilms

| compd | <i>S. aureus</i> ATCC6538              |                                                        |                                       |                                                       | <i>S. aureus</i> SH1000   |                                                        |                          |                                                       | <i>S. epidermidis</i>     |                                                        |                          |                                                       | <i>P. gingivalis</i> ATCC33277 |                                                        |                          |                                                       | <i>E. coli</i> TG1        |                                                        |                          |                                                       |
|-------|----------------------------------------|--------------------------------------------------------|---------------------------------------|-------------------------------------------------------|---------------------------|--------------------------------------------------------|--------------------------|-------------------------------------------------------|---------------------------|--------------------------------------------------------|--------------------------|-------------------------------------------------------|--------------------------------|--------------------------------------------------------|--------------------------|-------------------------------------------------------|---------------------------|--------------------------------------------------------|--------------------------|-------------------------------------------------------|
|       | 37 °C                                  |                                                        |                                       |                                                       | 37 °C                     |                                                        |                          |                                                       | 37 °C                     |                                                        |                          |                                                       | 37 °C                          |                                                        |                          |                                                       | 37 °C                     |                                                        |                          |                                                       |
|       | BIC <sub>50</sub> <sup>a</sup><br>(μM) | 95%<br>confidence<br>interval for<br>BIC <sub>50</sub> | IC <sub>50</sub> <sup>b</sup><br>(μM) | 95%<br>confidence<br>interval for<br>IC <sub>50</sub> | BIC <sub>50</sub><br>(μM) | 95%<br>confidence<br>interval for<br>BIC <sub>50</sub> | IC <sub>50</sub><br>(μM) | 95%<br>confidence<br>interval for<br>IC <sub>50</sub> | BIC <sub>50</sub><br>(μM) | 95%<br>confidence<br>interval for<br>BIC <sub>50</sub> | IC <sub>50</sub><br>(μM) | 95%<br>confidence<br>interval for<br>IC <sub>50</sub> | BIC <sub>50</sub><br>(μM)      | 95%<br>confidence<br>interval for<br>BIC <sub>50</sub> | IC <sub>50</sub><br>(μM) | 95%<br>confidence<br>interval for<br>IC <sub>50</sub> | BIC <sub>50</sub><br>(μM) | 95%<br>confidence<br>interval for<br>BIC <sub>50</sub> | IC <sub>50</sub><br>(μM) | 95%<br>confidence<br>interval for<br>IC <sub>50</sub> |
| 1     | 59.3                                   | 25.1 - 140.3                                           | 231.3                                 | 220.0 - 243.2                                         | 162.7                     | 112.1 - 236.0                                          | > 400.0                  |                                                       | ~ 201.7 <sup>d</sup>      |                                                        | ~ 329.0                  |                                                       | 13.2                           | 9.0 - 19.2                                             | 32.1                     | 12.3 - 83.2                                           | ~ 47.8                    |                                                        | 34.1                     | 29.4 - 39.6                                           |
| 2     | 2.8                                    | 1.9 - 4.0                                              | 7.8                                   | 3.8 - 16.0                                            | 3.4                       | 2.1 - 5.4                                              | 8.3                      | 6.2 - 11.1                                            | ~ 5.6                     |                                                        | ~ 11.1                   |                                                       | 3.9                            | 3.2 - 4.6                                              | 6.0                      | 2.3 - 15.3                                            | ~ 6.5                     |                                                        | 7.7                      | 5.7 - 10.4                                            |
| 3     | 95.3                                   | 41.4 - 219.5                                           | ~ 96.1                                |                                                       | ~ 200.3                   |                                                        | ~ 175.4                  |                                                       | > 400.0                   |                                                        | 86.2                     | 63.1 - 117.8                                          | 5.3                            | 2.5 - 11.3                                             | 5.1                      | 3.1 - 8.4                                             | 110.2                     | 73.8 - 164.6                                           | 30.0                     | 24.3 - 37.0                                           |
| 4     | ~ 12.3                                 |                                                        | 60.1                                  | 50.0 - 72.3                                           | 66.5                      | 49.1 - 90.0                                            | 89.4                     | 75.5 - 105.8                                          | > 400.0                   |                                                        | 54.4                     | 38.0 - 77.7                                           | 3.7                            | 2.0 - 6.8                                              | 8.2                      | 5.4 - 12.3                                            | 84.7                      | 45.7 - 157.0                                           | 23.0                     | 15.7 - 33.7                                           |
| 5     | 34.4                                   | 22.2 - 53.3                                            | 62.3                                  | 52.1 - 74.6                                           | 70.6                      | 51.3 - 97.1                                            | 71.5                     | 51.8 - 98.7                                           | > 400.0                   |                                                        | 39.5                     | 25.4 - 61.5                                           | 5.7                            | 2.6 - 12.6                                             | 4.0                      | 1.4 - 11.7                                            | ~ 45.7                    |                                                        | 17.1                     | 14.3 - 20.5                                           |
| 6     | 75.2                                   | 41.4 - 136.6                                           | > 400.0                               |                                                       | > 400.0                   |                                                        | > 400.0                  |                                                       | > 400.0                   |                                                        | > 400.0                  |                                                       | 18.1                           | 7.7 - 42.5                                             | 19.5                     | 7.7 - 49.2                                            | ~ 192.5                   |                                                        | 182.8                    | 108.1 - 309.3                                         |

  

| compd | <i>P. aeruginosa</i> PA14 |                                                        |                          |                                                       | <i>S. Typhimurium</i> ATCC14028 |                                                        |                          |                                                       | <i>S. liquefaciens</i> MG44 |                                                        |                          |                                                       | <i>B. cepacia</i> LMG1222T |                                                        |                          |                                                       | <i>C. albicans</i> SC5314 |                                                        |         |               |              |
|-------|---------------------------|--------------------------------------------------------|--------------------------|-------------------------------------------------------|---------------------------------|--------------------------------------------------------|--------------------------|-------------------------------------------------------|-----------------------------|--------------------------------------------------------|--------------------------|-------------------------------------------------------|----------------------------|--------------------------------------------------------|--------------------------|-------------------------------------------------------|---------------------------|--------------------------------------------------------|---------|---------------|--------------|
|       | 25 °C <sup>c</sup>        |                                                        |                          |                                                       | 37 °C <sup>c</sup>              |                                                        |                          |                                                       | 25 °C                       |                                                        |                          |                                                       | 25 °C                      |                                                        |                          |                                                       | 37 °C                     |                                                        |         |               |              |
|       | BIC <sub>50</sub><br>(μM) | 95%<br>confidence<br>interval for<br>BIC <sub>50</sub> | IC <sub>50</sub><br>(μM) | 95%<br>confidence<br>interval for<br>IC <sub>50</sub> | BIC <sub>50</sub><br>(μM)       | 95%<br>confidence<br>interval for<br>BIC <sub>50</sub> | IC <sub>50</sub><br>(μM) | 95%<br>confidence<br>interval for<br>IC <sub>50</sub> | BIC <sub>50</sub><br>(μM)   | 95%<br>confidence<br>interval for<br>BIC <sub>50</sub> | IC <sub>50</sub><br>(μM) | 95%<br>confidence<br>interval for<br>IC <sub>50</sub> | BIC <sub>50</sub><br>(μM)  | 95%<br>confidence<br>interval for<br>BIC <sub>50</sub> | IC <sub>50</sub><br>(μM) | 95%<br>confidence<br>interval for<br>IC <sub>50</sub> | BIC <sub>50</sub><br>(μM) | 95%<br>confidence<br>interval for<br>BIC <sub>50</sub> |         |               |              |
| 1     | 2.1                       | 1.2 - 3.7                                              | ♦                        |                                                       | 104.4                           | 55.8 - 195.3                                           | 45.2                     | 36.3 - 56.1                                           | 48.4                        | 37.5 - 62.4                                            | ♦                        |                                                       | 167.9                      | 115.1 - 244.8                                          | 177.0                    | 127.3 - 246.2                                         | ~ 356.3                   | > 400.0                                                | 145.4   | 130.8 - 161.6 |              |
| 2     | 4.0                       | 3.0 - 5.2                                              | ♦                        |                                                       | 118.4                           | 57.8 - 242.5                                           | 10.0                     | 8.0 - 12.6                                            | ~ 5.9                       |                                                        | ♦                        |                                                       | 18.8                       | 14.2 - 24.9                                            | 38.0                     | 26.8 - 54.0                                           | 145.4                     | 9.5 - 400.0                                            | > 400.0 | 6.2           | 5.1 - 7.4    |
| 3     | 0.9                       | 0.5 - 1.8                                              | ♦                        | > 400.0                                               | > 400.0                         | > 400.0                                                |                          |                                                       | 2.0                         | 1.6 - 2.5                                              | ♦                        |                                                       | 10.4                       | 8.7 - 12.6                                             | 154.0                    | 116.4 - 203.8                                         | 88.1                      | 21.5 - 360.9                                           | > 400.0 | 93.9          | 80.1 - 110.2 |
| 4     | 9.8                       | 6.8 - 14.1                                             | ♦                        | > 400.0                                               | > 400.0                         | > 400.0                                                |                          |                                                       | 7.1                         | 3.7 - 13.9                                             | ♦                        |                                                       | 4.4                        | 3.7 - 5.3                                              | 118.4                    | 88.0 - 159.3                                          | 189.0                     | 56.6 - 400.0                                           | > 400.0 | 66.7          | 56.0 - 79.4  |
| 5     | 13.5                      | 9.0 - 20.5                                             | ♦                        | > 400.0                                               | > 400.0                         | > 400.0                                                |                          |                                                       | 4.4                         | 4.0 - 4.8                                              | ♦                        |                                                       | 8.8                        | 6.7 - 11.7                                             | 125.4                    | 92.8 - 169.3                                          | 331.0                     | 84.4 - 400.0                                           | > 400.0 | 64.0          | 57.2 - 71.8  |
| 6     | 71.6                      | 21.8 - 234.8                                           | > 400.0                  | > 400.0                                               | > 400.0                         | > 400.0                                                |                          |                                                       | 2.0                         | 1.4 - 2.9                                              | 2.4                      | 0.9 - 6.3                                             | 63.3                       | 16.2 - 246.9                                           | > 400.0                  | > 400.0                                               | > 400.0                   | > 400.0                                                | > 400.0 | > 400.0       |              |

<sup>a</sup> BIC<sub>50</sub>: concentration of compound needed to inhibit biofilm formation by 50%. <sup>b</sup> IC<sub>50</sub>: concentration of compound needed to inhibit planktonic growth by 50%. <sup>c</sup> Biofilm formation was studied at 25 °C and 37 °C to simulate environmental and in vivo conditions, respectively. <sup>d</sup> ~: The B(IC)<sub>50</sub> values could not be accurately calculated due to the steepness of the curve. ♦ The effect on the planktonic growth has previously been determined by growth curve analysis (1-3). Compounds that have a biofilm-specific activity (2 x BIC<sub>50</sub> < IC<sub>50</sub>) are marked in grey.

**TABLE S3** Effect of 5-Ar-2AIs on a panel of mixed *E. coli*/*P. aeruginosa* and *S. aureus*/*S. epidermidis* biofilms

| compd | <i>E. coli</i> TG1 + <i>P. aeruginosa</i> PA14 |                                                        |                                       |                                                       | <i>S. aureus</i> ATCC6538 + <i>S. epidermidis</i> |                                                        |                          |                                                       |
|-------|------------------------------------------------|--------------------------------------------------------|---------------------------------------|-------------------------------------------------------|---------------------------------------------------|--------------------------------------------------------|--------------------------|-------------------------------------------------------|
|       | 37 °C                                          |                                                        |                                       |                                                       | 37 °C                                             |                                                        |                          |                                                       |
|       | BIC <sub>50</sub> <sup>a</sup><br>(μM)         | 95%<br>confidence<br>interval for<br>BIC <sub>50</sub> | IC <sub>50</sub> <sup>b</sup><br>(μM) | 95%<br>confidence<br>interval for<br>IC <sub>50</sub> | BIC <sub>50</sub><br>(μM)                         | 95%<br>confidence<br>interval for<br>BIC <sub>50</sub> | IC <sub>50</sub><br>(μM) | 95%<br>confidence<br>interval for<br>IC <sub>50</sub> |
| 1     | 74.3                                           | 33.0 – 167.7                                           | 60.7                                  | 42.4 – 87.1                                           | 44.2                                              | 18.4 – 119.0                                           | ~ 356.5 <sup>c</sup>     |                                                       |
| 2     | 36.8                                           | 16.2 – 85.0                                            | 19.9                                  | 14.6 – 26.9                                           | ~ 7.2                                             |                                                        | ~ 9.9                    |                                                       |
| 3     | 7.4                                            | 3.8 – 21.5                                             | > 400.0                               |                                                       | ~ 26.3                                            |                                                        | ~ 140.5                  |                                                       |
| 4     | 17.8                                           | 12.7 – 58.2                                            | > 400.0                               |                                                       | 6.8                                               | 1.7 – 36.3                                             | ~ 117.7                  |                                                       |
| 5     | 0.5                                            | 0.2 – 1.5                                              | > 400.0                               |                                                       | ~ 66.6                                            |                                                        | ~ 91.7                   |                                                       |
| 6     | 34.6                                           | 17.9 – 68.5                                            | > 400.0                               |                                                       | 33.9                                              | 17.1 – 67.5                                            | ~ 391.6                  |                                                       |

<sup>a</sup> BIC<sub>50</sub>: concentration of inhibitor needed to inhibit biofilm formation by 50%. <sup>b</sup> IC<sub>50</sub>: concentration of inhibitor needed to inhibit planktonic growth by 50%. <sup>c</sup> ~: The B(IC)<sub>50</sub> values could not be accurately calculated due to the steepness of the curve. Compounds that have a biofilm-specific activity (2 x BIC<sub>50</sub> < IC<sub>50</sub>) are marked in grey.

**TABLE S4** Effect of novel 5-Ar-2AIs on a panel of monospecies biofilms of bacteria and fungi.

| compd     | <i>S. aureus</i> ATCC6538              |                                                        |                                       |                                                       | <i>P. aeruginosa</i> PA14 |                                                        |                          |                                                       | <i>E. coli</i> TG1        |                                                        |                          |                                                       | <i>C. albicans</i> SC5314 |                                                        |                          |                                                       |                           |                                                        |         |               |         |             |
|-----------|----------------------------------------|--------------------------------------------------------|---------------------------------------|-------------------------------------------------------|---------------------------|--------------------------------------------------------|--------------------------|-------------------------------------------------------|---------------------------|--------------------------------------------------------|--------------------------|-------------------------------------------------------|---------------------------|--------------------------------------------------------|--------------------------|-------------------------------------------------------|---------------------------|--------------------------------------------------------|---------|---------------|---------|-------------|
|           | 37 °C                                  |                                                        | 25 °C                                 |                                                       | 37 °C                     |                                                        | 25 °C                    |                                                       | 37 °C                     |                                                        | 37 °C                    |                                                       | 37 °C                     |                                                        |                          |                                                       |                           |                                                        |         |               |         |             |
|           | BIC <sub>50</sub> <sup>a</sup><br>(μM) | 95%<br>confidence<br>interval<br>for BIC <sub>50</sub> | IC <sub>50</sub> <sup>b</sup><br>(μM) | 95%<br>confidence<br>interval<br>for IC <sub>50</sub> | BIC <sub>50</sub><br>(μM) | 95%<br>confidence<br>interval<br>for BIC <sub>50</sub> | IC <sub>50</sub><br>(μM) | 95%<br>confidence<br>interval<br>for IC <sub>50</sub> | BIC <sub>50</sub><br>(μM) | 95%<br>confidence<br>interval<br>for BIC <sub>50</sub> | IC <sub>50</sub><br>(μM) | 95%<br>confidence<br>interval<br>for IC <sub>50</sub> | BIC <sub>50</sub><br>(μM) | 95%<br>confidence<br>interval<br>for BIC <sub>50</sub> | IC <sub>50</sub><br>(μM) | 95%<br>confidence<br>interval<br>for IC <sub>50</sub> | BIC <sub>50</sub><br>(μM) | 95%<br>confidence<br>interval<br>for BIC <sub>50</sub> |         |               |         |             |
| <b>8a</b> | ~ 22.9 <sup>c</sup>                    |                                                        | 17.9                                  | 15.3 – 21.0                                           | > 400.0                   |                                                        | 75.3                     | 46.9 - 121.1                                          | > 400.0                   |                                                        | 66.0                     | 46.9 - 92.8                                           | ~ 47.2                    |                                                        | 51.2                     | 29.1 - 90.2                                           | 41.2                      | 25.3 – 67.0                                            | 10.2    | 4.4 – 23.9    | 9.3     | 7.5 – 11.7  |
| <b>8b</b> | 5.8                                    | 2.5 – 13.5                                             | 9.3                                   | 8.3 - 10.3                                            | > 400.0                   |                                                        | 222.5                    | 143.6 - 344.8                                         | > 400.0                   |                                                        | 115.1                    | 89.0 – 149.0                                          | 29.5                      | 15.7 - 55.4                                            | 91.9                     | 33.5 - 252.1                                          | 329.9                     | 161.9 – 400.0                                          | 6.1     | 3.5 - 10.8    | 11.0    | 8.2 – 14.7  |
| <b>8c</b> | 41.0                                   | 2.1 – 400.0                                            | 172.7                                 | 151.1 - 197.3                                         | > 400.0                   |                                                        | > 400.0                  |                                                       | > 400.0                   |                                                        | 344.7                    | 282.2 – 400.0                                         | > 400.0                   |                                                        | 150.0                    | 84.8 - 265.2                                          | > 400.0                   |                                                        | 74.1    | 21.8 - 252.4  | > 100.0 |             |
| <b>8d</b> | 116.0                                  | 21.6 – 400.0                                           | > 400.0                               |                                                       | > 400.0                   |                                                        | > 400.0                  |                                                       | > 400.0                   |                                                        | > 400.0                  |                                                       | > 400.0                   |                                                        | 255.2                    | 194.1 - 335.5                                         | > 400.0                   |                                                        | 46.3    | 25.8 - 83.2   | > 100.0 |             |
| <b>8e</b> | 1.0                                    | 0.5 - 1.7                                              | 46.5                                  | 24.1 – 89.8                                           | > 400.0                   |                                                        | 62.9                     | 47.9 – 82.5                                           | > 400.0                   |                                                        | 167.3                    | 110.8 - 252.6                                         | ~ 26.7                    |                                                        | 188.9                    | 105.7 - 337.5                                         | ~ 27.6                    |                                                        | 10.5    | 6.2 - 17.7    | ~ 11.9  |             |
| <b>8f</b> | 6.7                                    | 3.2 - 13.8                                             | ~ 24.1                                |                                                       | > 400.0                   |                                                        | > 400.0                  |                                                       | > 400.0                   |                                                        | > 400.0                  |                                                       | 29.1                      | 18.1 - 46.9                                            | > 400.0                  |                                                       | 305.9                     | 94.2 – 400.0                                           | 370.2   | 39.2 – 400.0  | 8.9     | 7.1 – 11.2  |
| <b>8g</b> | 8.5                                    | 3.3 – 22.0                                             | 19.1                                  | 16.1 - 22.6                                           | > 400.0                   |                                                        | > 400.0                  |                                                       | > 400.0                   |                                                        | > 400.0                  |                                                       | 43.0                      | 10.8 - 170.7                                           | > 400.0                  |                                                       | > 400.0                   |                                                        | 236.6   | 108.4 – 400.0 | 21.1    | 16.2 – 27.4 |
| <b>8h</b> | 3.8                                    | 1.5 - 9.8                                              | 19.5                                  | 14.4 - 26.6                                           | > 400.0                   |                                                        | > 400.0                  |                                                       | > 400.0                   |                                                        | > 400.0                  |                                                       | > 400.0                   |                                                        | > 400.0                  |                                                       | > 400.0                   |                                                        | > 400.0 |               | > 100.0 |             |

<sup>a</sup> BIC<sub>50</sub>: concentration of inhibitor needed to inhibit biofilm formation by 50%. <sup>b</sup> IC<sub>50</sub>: concentration of inhibitor needed to inhibit planktonic growth by 50%. <sup>c</sup> ~: The B(IC)<sub>50</sub> values could not be accurately calculated due to the steepness of the curve. Compounds that have a biofilm-specific activity (2 x BIC<sub>50</sub> < IC<sub>50</sub>) are marked in grey.

**TABLE S5** Effect of novel 5-Ar-2AIs on a panel of mixed species biofilms

| compd     | <i>C. albicans</i> SC5314 +<br><i>S. epidermidis</i> |             |             |             | <i>S. aureus</i> ATCC6538 +<br><i>S. epidermidis</i> |                                                        |                                       |                                                       | <i>E. coli</i> TG1 +<br><i>P. aeruginosa</i> PA14 |                                                        |                          |                                                       |
|-----------|------------------------------------------------------|-------------|-------------|-------------|------------------------------------------------------|--------------------------------------------------------|---------------------------------------|-------------------------------------------------------|---------------------------------------------------|--------------------------------------------------------|--------------------------|-------------------------------------------------------|
|           | CFUs % survival                                      |             |             |             | 37 °C                                                |                                                        |                                       |                                                       | 37 °C                                             |                                                        |                          |                                                       |
|           | 25 µM                                                |             | 100 µM      |             | BIC <sub>50</sub> <sup>a</sup><br>(µM)               | 95%<br>confidence<br>interval for<br>BIC <sub>50</sub> | IC <sub>50</sub> <sup>b</sup><br>(µM) | 95%<br>confidence<br>interval<br>for IC <sub>50</sub> | BIC <sub>50</sub><br>(µM)                         | 95%<br>confidence<br>interval<br>for BIC <sub>50</sub> | IC <sub>50</sub><br>(µM) | 95%<br>confidence<br>interval<br>for IC <sub>50</sub> |
|           | <i>C.a.</i>                                          | <i>S.e.</i> | <i>C.a.</i> | <i>S.e.</i> |                                                      |                                                        |                                       |                                                       |                                                   |                                                        |                          |                                                       |
| <b>8a</b> | 62.4                                                 | 1541.7      | 1.0         | 1.0         | 0.0                                                  | 0.0 – 0.3                                              | ~ 26.1 <sup>c</sup>                   | 6.6                                                   | 2.3 – 19.2                                        | > 400.0                                                |                          |                                                       |
| <b>8b</b> | 2.0                                                  | 6.1         | 18.2        | 0.7         | 1.1                                                  | 0.7 – 1.7                                              | ~ 22.2                                | > 400.0                                               |                                                   | > 400.0                                                |                          |                                                       |
| <b>8c</b> | 3.2                                                  | 637.0       | 8.4         | 965.7       | 5.0                                                  | 2.9 – 8.5                                              | > 400.0                               | > 400.0                                               |                                                   | > 400.0                                                |                          |                                                       |
| <b>8d</b> | 2.5                                                  | 1763.9      | 1.4         | 1277.8      | > 400.0                                              |                                                        | > 400.0                               | > 400.0                                               |                                                   | > 400.0                                                |                          |                                                       |
| <b>8e</b> | 10.0                                                 | 93.1        | 2.5         | 0.0         | ~ 3.0                                                |                                                        | ~ 23.6                                | 100.7                                                 | 7.5 –<br>400.0                                    | > 400.0                                                |                          |                                                       |
| <b>8f</b> | 2.9                                                  | 2.5         | 7.2         | 0.3         | 2.0                                                  | 1.1 – 3.5                                              | ~ 22.5                                | 399.6                                                 | 26.9 –<br>400.0                                   | > 400.0                                                |                          |                                                       |
| <b>8g</b> | 3.3                                                  | 0.0         | 5.9         | 0.0         | ~ 5.6                                                |                                                        | 15.5                                  | 9.9 – 24.4                                            | > 400.0                                           | > 400.0                                                |                          |                                                       |
| <b>8h</b> | 6.7                                                  | 2.0         | 3.5         | 2.2         | 4.9                                                  | 2.9 – 8.2                                              | ~ 25.1                                | > 400.0                                               |                                                   | > 400.0                                                |                          |                                                       |

*C.a.* : *Candida albicans*; *S.e.* : *Staphylococcus epidermidis*. <sup>a</sup> BIC<sub>50</sub>: concentration of inhibitor needed to inhibit biofilm formation by 50%. <sup>b</sup> IC<sub>50</sub>: concentration of inhibitor needed to inhibit planktonic growth by 50%. <sup>c</sup> ~: The B(IC)<sub>50</sub> values could not be accurately calculated due to the steepness of the curve. Compounds that have a biofilm-specific activity (2 x BIC<sub>50</sub> < IC<sub>50</sub>) are marked in grey and compounds with < 75 % CFU survival are marked in dark grey.



## REFERENCES

1. **Steenackers HP, Ermolat'ev DS, Savaliya B, De Weerd A, De Coster D, Shah A, Van der Eycken EV, De Vos DE, Vanderleyden J, De Keersmaecker SC.** 2011. Structure-activity relationship of 4(5)-aryl-2-amino-1H-imidazoles, N1-substituted 2-aminoimidazoles and imidazo[1,2-a]pyrimidinium salts as inhibitors of biofilm formation by *Salmonella* Typhimurium and *Pseudomonas aeruginosa*. *J Med Chem* **54**:472-484.
2. **Steenackers HP, Ermolat'ev DS, Savaliya B, Weerd AD, Coster DD, Shah A, Van der Eycken EV, De Vos DE, Vanderleyden J, De Keersmaecker SC.** 2011. Structure-activity relationship of 2-hydroxy-2-aryl-2,3-dihydro-imidazo[1,2-a]pyrimidinium salts and 2N-substituted 4(5)-aryl-2-amino-1H-imidazoles as inhibitors of biofilm formation by *Salmonella* Typhimurium and *Pseudomonas aeruginosa*. *Bioorg Med Chem* **19**:3462-3473.
3. **Steenackers H, Ermolat'ev D, Trang TT, Savalia B, Sharma UK, De Weerd A, Shah A, Vanderleyden J, Van der Eycken EV.** 2014. Microwave-assisted one-pot synthesis and anti-biofilm activity of 2-amino-1H-imidazole/triazole conjugates. *Org Biomol Chem* **12**:3671-3678.
